# Supplementary material for: A quantitative analysis of fidgeting in ADHD and its relation to performance and sustained attention on a cognitive task
Source: PubMed Central journal article supplement (PMC11246969; doi:10.3389/fpsyt.2024.1394096), 2024-07-01
Supplement: Table_1.pdf [file Table_1.pdf]

## *Supplementary Material*

### 1 Supplementary Table

Table A. Fidget ball membership differences

| Characteristics                                | No Fidget Ball<br>(n=21)    | Fidget Ball (n=49) | t-value       |        |
|------------------------------------------------|-----------------------------|--------------------|---------------|--------|
| Gender (Male Ratio)                            | 40%                         | 83%                | 4.24*         |        |
| BAARS (Self Report) [1~30]                     | 60.0 (9.3)                  | 59.8 (9.0)         | -0.08         |        |
| BDEFS (Self Report) [Section 5: 77~89]         | 26.8 (6.0)                  | 28.2 (7.4)         | 0.75          |        |
| ARI (Self Report) [Affective Reactivity Index] | 9.2 (2.5)                   | 8.6 (2.4)          | -0.84         |        |
| <b>Flanker</b>                                 |                             |                    |               |        |
| Total Score                                    | 115.4 (8.1)                 | 115.5 (7.2)        | 0.06          |        |
| Incorrect                                      | 4.3 (8.1)                   | 3.2 (5.4)          | -0.66         |        |
| Omission Errors                                | 6.0 (25.5)                  | 1.2 (4.1)          | -1.24         |        |
| Congruent Correct                              | 39.7 (0.6)                  | 39.7 (0.7)         | -0.07         |        |
| Incongruent Correct                            | 36.3 (7.8)                  | 36.3 (6.5)         | 0.02          |        |
| Neutral Correct                                | 39.4 (1.0)                  | 39.5 (1.2)         | 0.27          |        |
| Reaction Time (Mu)                             | 355.6 (43.7)                | 375.0 (45.2)       | 1.63          |        |
| Reaction Time Variability (Tau)                | 70.9 (25.0)                 | 69.3 (26.7)        | -0.23         |        |
| <b>Task Performance</b>                        |                             |                    |               |        |
| Digits                                         | 10.4 (2.9)                  | 11.2 (3.3)         | 1.02          |        |
| Stroop Color                                   | 69.4 (13.9)                 | 70.6 (12.5)        | 0.35          |        |
| Stroop Color-Word                              | 50.4 (8.0)                  | 49.6 (9.4)         | 0.36          |        |
| <b>Fidget Variables</b>                        |                             |                    |               |        |
| Arm+<br>Leg                                    | Number of fidgets per trial | 5.3 (2.2)          | 4.5 (2.3)     | -1.42  |
|                                                | Fidget time variability     | 321.2 (115.4)      | 244.2 (125.4) | -2.32* |
|                                                | Fidget intensity            | 0.7 (0.8)          | 0.6 (1.1)     | -0.55  |

\*p<0.05, \*\*p<0.01
